# Supplementary material for: Hypersensitivity response has negligible impact on Hematopoietic Stem Cells
Source: PubMed Central journal article supplement (PMC8365095; doi:10.1016/j.stemcr.2021.06.013), 2021-07-22
Supplement: mmc1.pdf [file mmc1.pdf]

**Stem Cell Reports, Volume 16**

**Supplemental Information**

**Hypersensitivity response has negligible impact on Hematopoietic  
Stem Cells**

**Nir Bujanover, Roshina Thapa, Oron Goldstein, Leonid Olender, Omri Sharabi, Michael D.  
Milsom, and Roi Gazit**

# Supplementary Figure 1

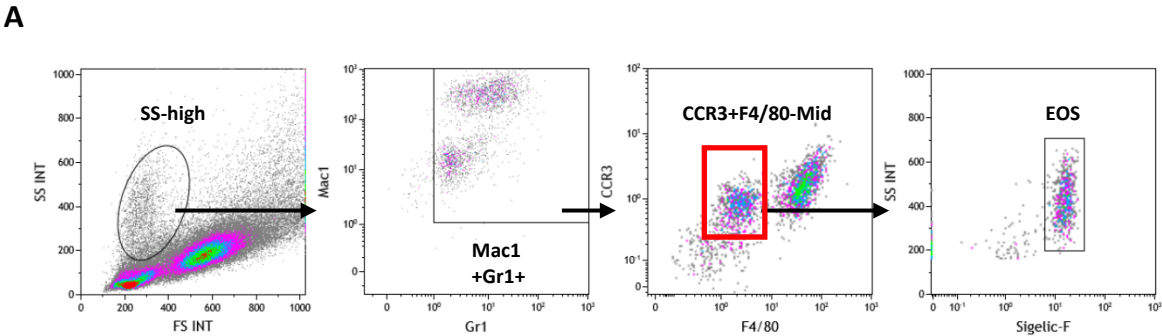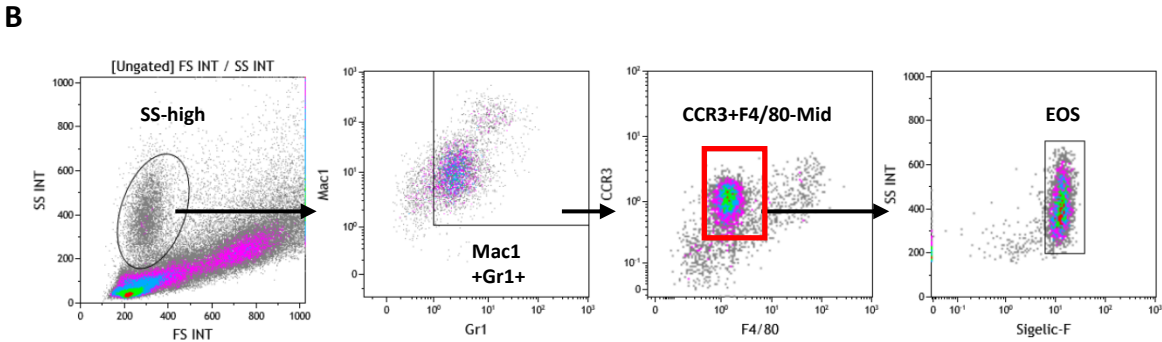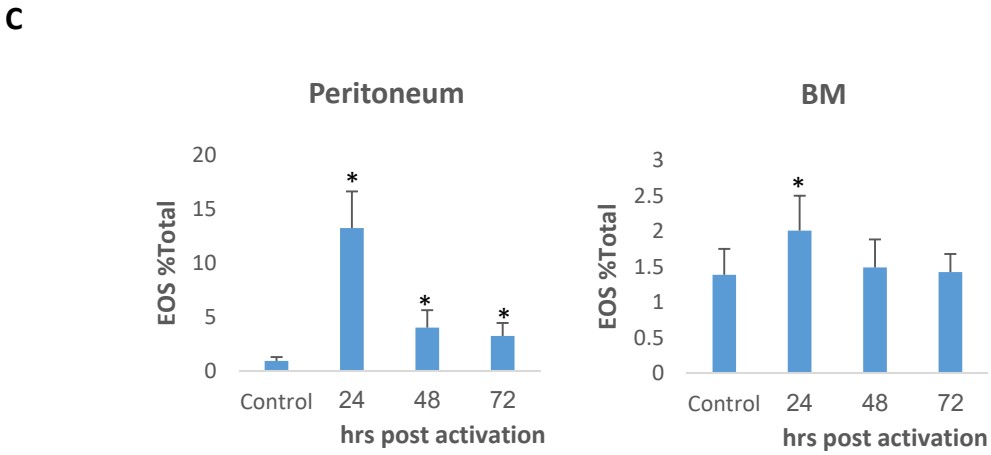

# Supplementary Figure 2

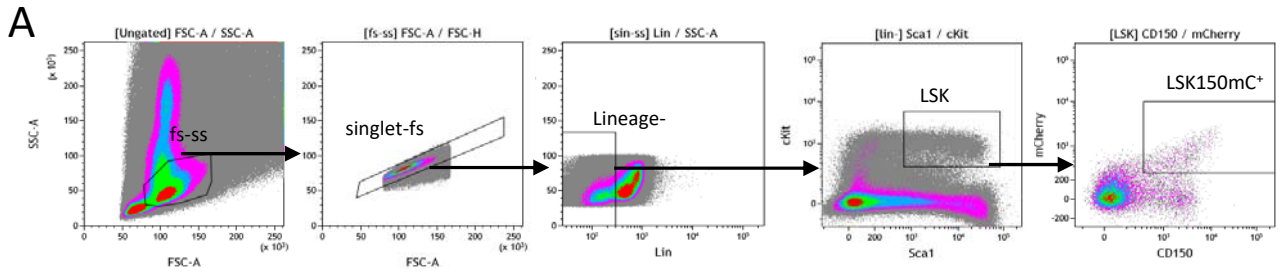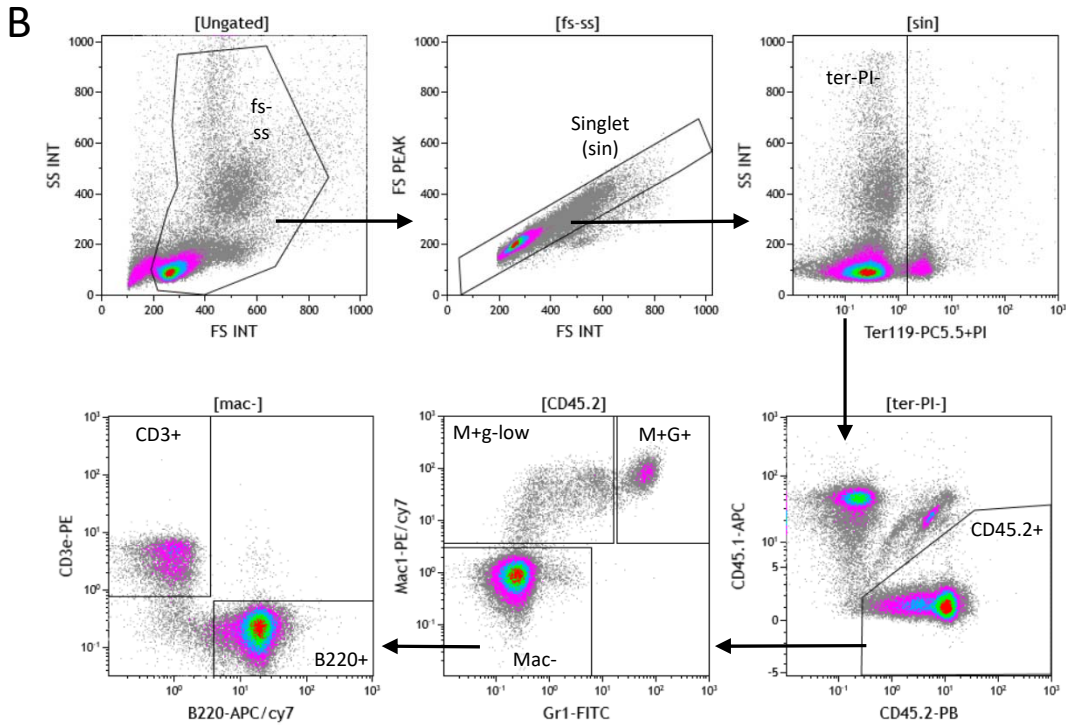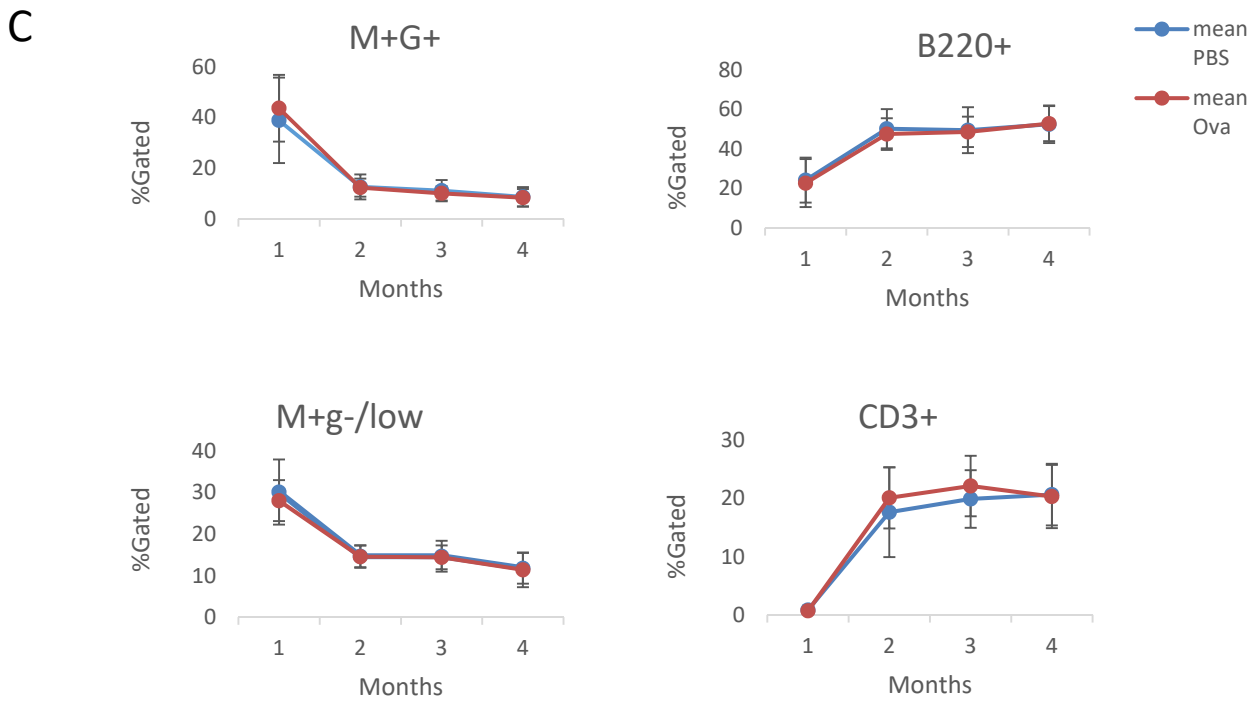

# Supplementary Figure 3

## A HSC related

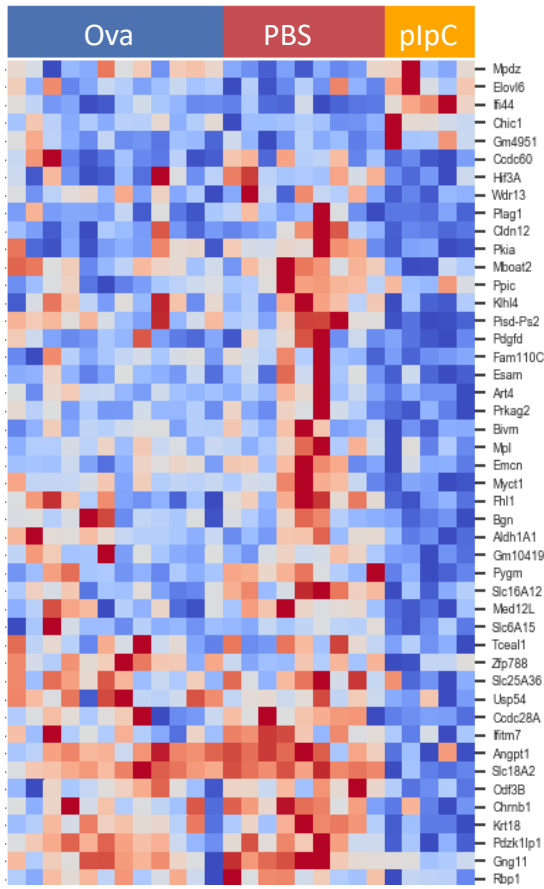

## B Cell surface

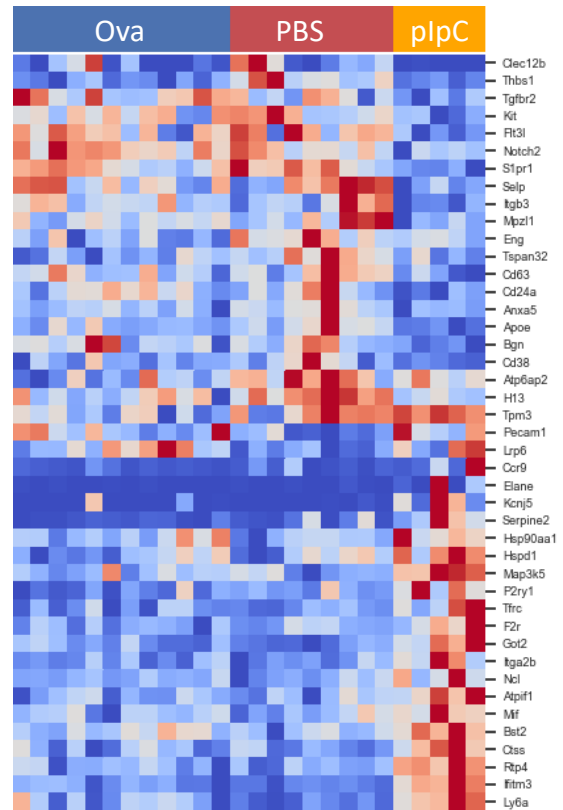

## C Inflammatory response

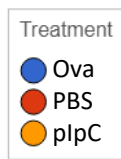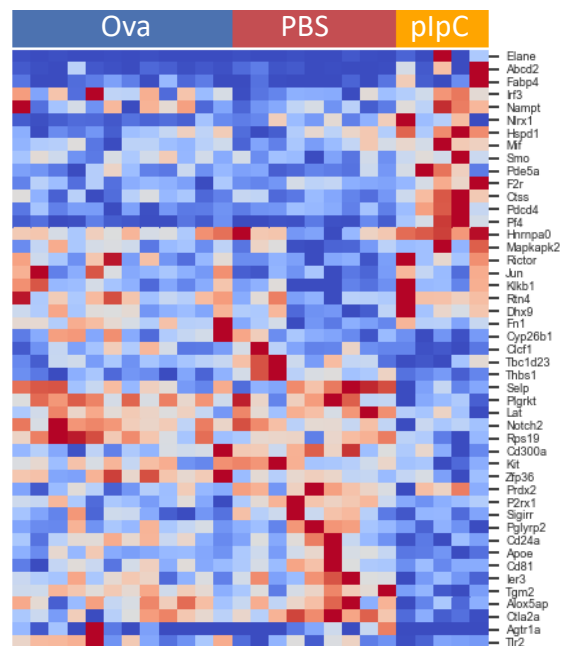

# Supplementary Figure 4

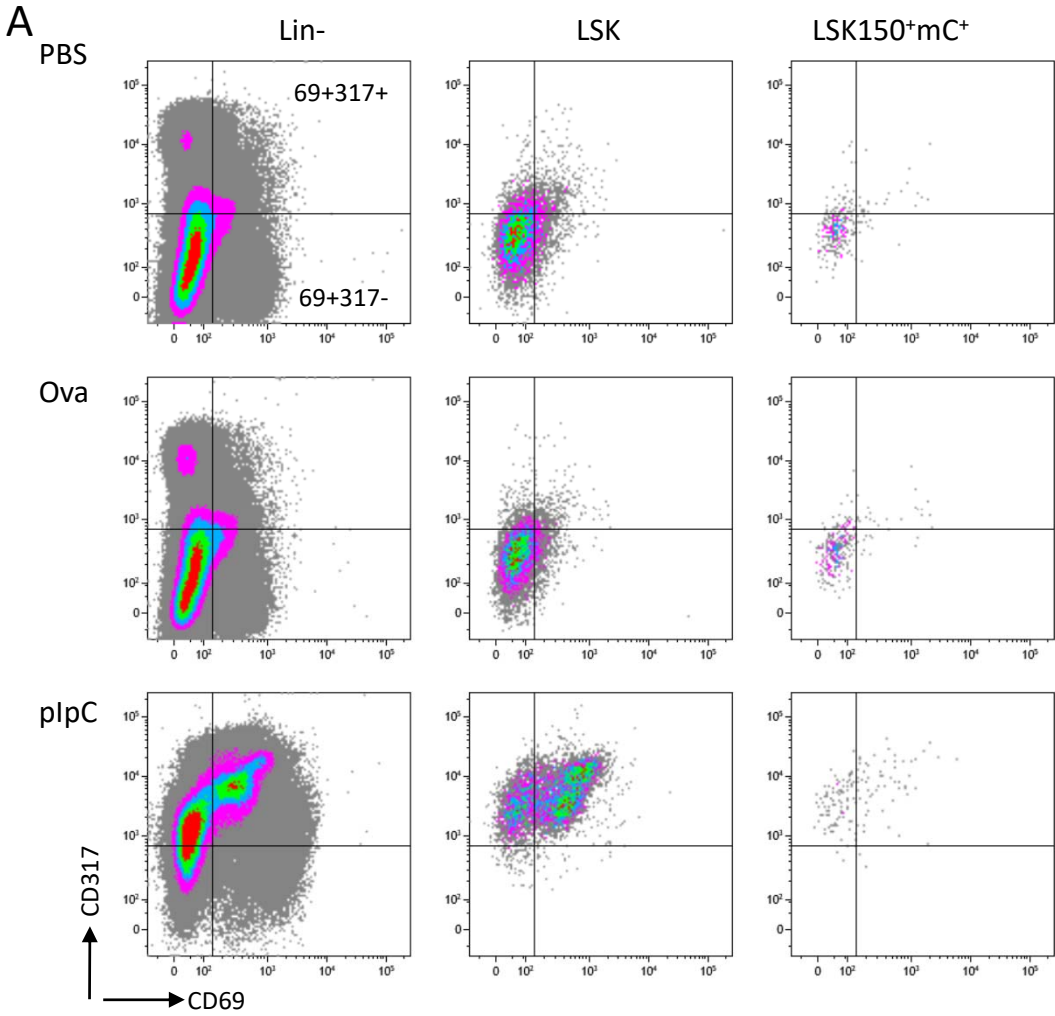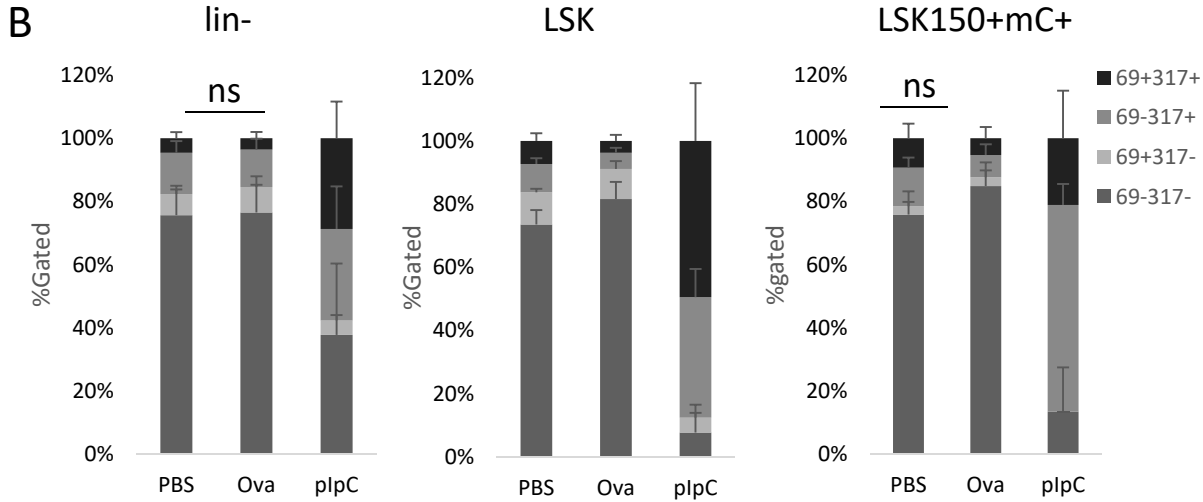

## Supplementary Table 1

| <b>Anti</b>          | <b>Fluorophore</b> | <b>Clone</b> | <b>Lot</b> | <b>Supplier</b> |
|----------------------|--------------------|--------------|------------|-----------------|
| c-Kit                | APC-cy7            | 2B8          | B231077    | BioLegend       |
| Sca1                 | APC                | D7           | B210898    | BioLegend       |
| CD150                | PE-cy7             | TC15-12F12.2 | B210492    | BioLegend       |
| CD48                 | PC5.5              | HM48-1       | B229042    | BioLegend       |
| Lineage cocktail     | Biotin-Strep-BV605 |              | B242305    | BioLegend       |
|                      | Pacific-Blue       |              | B223279    | BioLegend       |
| Gr1                  | FITC               | RB6-8C5      | B138194    | BioLegend       |
| Mac1(CD11b)          | PE-cy7             | M1/70        | B249268    | BioLegend       |
| B220                 | APC-cy7            | RA3-6B2      | B217170    | BioLegend       |
| CD3e                 | PE                 | 145-2C11     | C0031122   | Tonbo           |
| Ter119               | PC5.5              | TER-119      | B208036    | BioLegend       |
| CD45.1               | APC                | A20          | C0453103   | Tonbo           |
| CD45.2               | Pacific-Blue       | 104          | B169087    | BioLegend       |
| Ki67                 | FITC               | 16A8         | B169139    | BioLegend       |
| DAPI                 |                    |              | 1729803    | molecular probs |
| PI                   |                    |              | 10p0317    | Biotium         |
| CD69                 | FITC               | H1.2F3       | B205098    | BioLegend       |
| CD317( <i>Bst2</i> ) | PE                 | 927          | B171557    | BioLegend       |
| CD201( <i>EPCR</i> ) | PE                 | RCR-16       | B209944    | BioLegend       |
| CCR3                 | PC5.5              | J073E5       | B212349    | BioLegend       |
| F4/80                | APC                | BM8          | B199093    | BioLegend       |
